# Supplementary material
Source: Elsevier journal article supplement (http://iesriberadecastilla.centros.educa.jcyl.es/sitio/upload/MMC1.pdf)
Supplement: MMC1 [file MMC1.pdf]

# FORMACIÓN PROFESIONAL

*Curso: 2023 / 2024*

## EXÁMENES (EVALUACIÓN FINAL 1)

**FAMILIA PROFESIONAL: MADERA, MUEBLE Y CORCHO**

**CICLO FORMATIVO: CARPINTERÍA Y MUEBLE (GRADO BÁSICO)**

| CURSO | MÓDULO PROFESIONAL                                             | PROFESORADO                                                                       | FECHA                                  | HORA                    | AULA                 |
|-------|----------------------------------------------------------------|-----------------------------------------------------------------------------------|----------------------------------------|-------------------------|----------------------|
| 1º    | 3074. Operaciones básicas de mecanizado de madera y derivados. | EDUARDO PRIETO SANTOS                                                             | 05/06/2024                             | 8:30                    | C 002                |
|       | 3076. Inst. de elementos de carpintería y mueble.              | BEGOÑA HERRERO PAJARES                                                            | 07/06/2024                             | 11:40                   | (C002) TALLER 1      |
|       | 3077. Materiales y productos textiles.                         | IBÁN PAÑERO                                                                       | 07/06/2024                             | 10:15                   | (E002) ATECA         |
|       | 3009. Ciencias aplicadas I.                                    | Manuel Francisco VERA DÍEZ                                                        | 30/05/2024                             | 11:40                   | D001                 |
|       | 3011. Comunicación y sociedad I.                               | Ignacio LASO PARGA<br>Ana Isabel DEL AMO DEL POZO                                 | 03/06/2024<br>04/06/2024               | 13:30<br>08:30          | D201<br>D001         |
| 2º    | 3076. Acabados básicos de la madera.                           | IBÁN PAÑERO                                                                       | 13/06/2024                             | 10:15                   | (D006) TAPIZADO      |
|       | 3078. Tapizado de muebles.                                     | BEGOÑA HERRERO PAJARES                                                            | 18/06/2024                             | 11:40                   | (D006) TAPIZADO      |
|       | 3006. Atención al cliente.                                     | ROBERTO MEDIAVILLA RAMOS                                                          | 27/05/2024                             | 12:35                   | (D006) TAPIZADO      |
|       | 3019. Ciencias aplicadas II.                                   | Ascensión VALLEJO MANRIQUE                                                        | 11/06/2024                             | 08:30                   | D201                 |
|       | 3012. Comunicación y sociedad II.                              | Ana Isabel DEL AMO DEL POZO<br>Inglés<br>Lengua y Literatura<br>Ciencias Sociales | 03/06/2024<br>05/06/2024<br>06/06/2024 | 13:30<br>10:15<br>08:30 | D202<br>D202<br>D202 |

## CICLO FORMATIVO: CICLO FORMATIVO: CARPINTERÍA Y MUEBLE (GRADO MEDIO)

| CURSO | MÓDULO PROFESIONAL                                 | PROFESORADO                  | FECHA      | HORA  | AULA                  |
|-------|----------------------------------------------------|------------------------------|------------|-------|-----------------------|
| 1º    | 0538. Materiales en carpintería y mueble.          | FERNANDO GARCÍA DUQUE        | 07/06/2024 | 12:30 | (E002) ATECA          |
|       | 0539. Soluciones constructivas.                    | SANTIAGO PASCUAL TOVAR       | 10/06/2024 | 12:30 | C102 (ORDENADORES 2)  |
|       | 0540. Operaciones básicas de carpintería.          | ROBERTO MEDIAVILLA RAMOS     | 05/06/2024 | 10:20 | (D004) TALLER         |
|       | 0541. Operaciones básicas de mobiliario.           | EDUARDO PRIETO SANTOS        | 07/06/2024 | 8:30  | C 003                 |
|       | 0542. Control de almacén.                          | José Antonio Pinto Domínguez | 10/06/2024 | 8:30  | (E002) ATECA          |
|       | 0548. Formación y orientación laboral.             | Marta MACHOTA                | 11/06/2024 | 13:30 | C102                  |
| 2º    | 0543. Documentación técnica                        | FERNANDO GARCÍA DUQUE        | 17/06/2024 | 8:30  | C001                  |
|       | 0544. Mecanizado de madera y derivados.            | JUAN T HERRERO GARCÍA        | 13/06/2024 | 11:40 | C 003                 |
|       | 0545. Mec. por control numérico en carp. y mueble. | José Antonio Pinto Domínguez | 12/06/2024 | 8:30  | C001<br>(ordenadores) |
|       | 0546. Montaje de carpintería y mueble.             | ALBERTO AYUSO                | 18/6/2024  | 8:30  | MAD 1                 |
|       | 0547. Acabados en carpintería y mueble.            | JUAN T HERRERO GARCÍA        | 13/06/2024 | 11:40 | C 003                 |

## CICLO FORMATIVO: GRADO SUPERIOR DISEÑO Y AMUEBLAMIENTO

| CURSO | MÓDULO PROFESIONAL                                        | PROFESORADO                  | FECHA                    | HORA  | AULA                       |
|-------|-----------------------------------------------------------|------------------------------|--------------------------|-------|----------------------------|
| 1º    | 0982. Procesos en industrias de carpintería y mueble.     | Jerónimo Gallardo Piani      | 11/06/24                 | 12:00 | E002 (Ateca)               |
|       | 0983. Fabricación en carpintería y mueble.                | ALBERTO AYUSO SANTAMARÍA     | 7/06/2024                | 8:30  | TALLER 1                   |
|       | 0984. Representación en carpintería y mobiliario.         | SANTIAGO PASCUAL TOVAR       | 7/06/2024                | 11:40 | (C102)<br>ORDENADORES<br>2 |
|       | 0985. Prototipos en carpintería y mueble.                 | IBÁN PAÑERO                  | 11/06/2024               | 8:30  | (C001)<br>ORDENADORES      |
|       | 0986. Desarrollo de producto en carpintería y mobiliario. | FERNANDO GARCÍA DUQUE        | 10/06/2024               | 8:30  | C001                       |
|       | 0992. Formación y orientación laboral.                    | Marta MACHOTA                | 10/06/2024               | 12:35 | A204                       |
| 2º    | 0987. Automatización en carpintería y mueble.             | José Antonio Pinto Domínguez |                          |       |                            |
|       | 0988. Instalaciones de carpintería y mobiliario.          | ALBERTO AYUSO                |                          |       |                            |
|       | 0989. Diseño de carpintería y mobiliario.                 | Jerónimo Gallardo Piani      |                          |       |                            |
|       | 0990. Gestión de la producción en carpintería y mueble.   | Jerónimo Gallardo Piani      |                          |       |                            |
|       | Proyecto                                                  |                              | 27/06/2024<br>28/06/2024 |       | E002                       |
